# Supplementary material for: Integrative analysis of transcriptome-wide association study and gene expression profiling identifies candidate genes associated with stroke
Source: PeerJ journal article supplement (doi:10.7717/peerj.7435), 2019-07-29

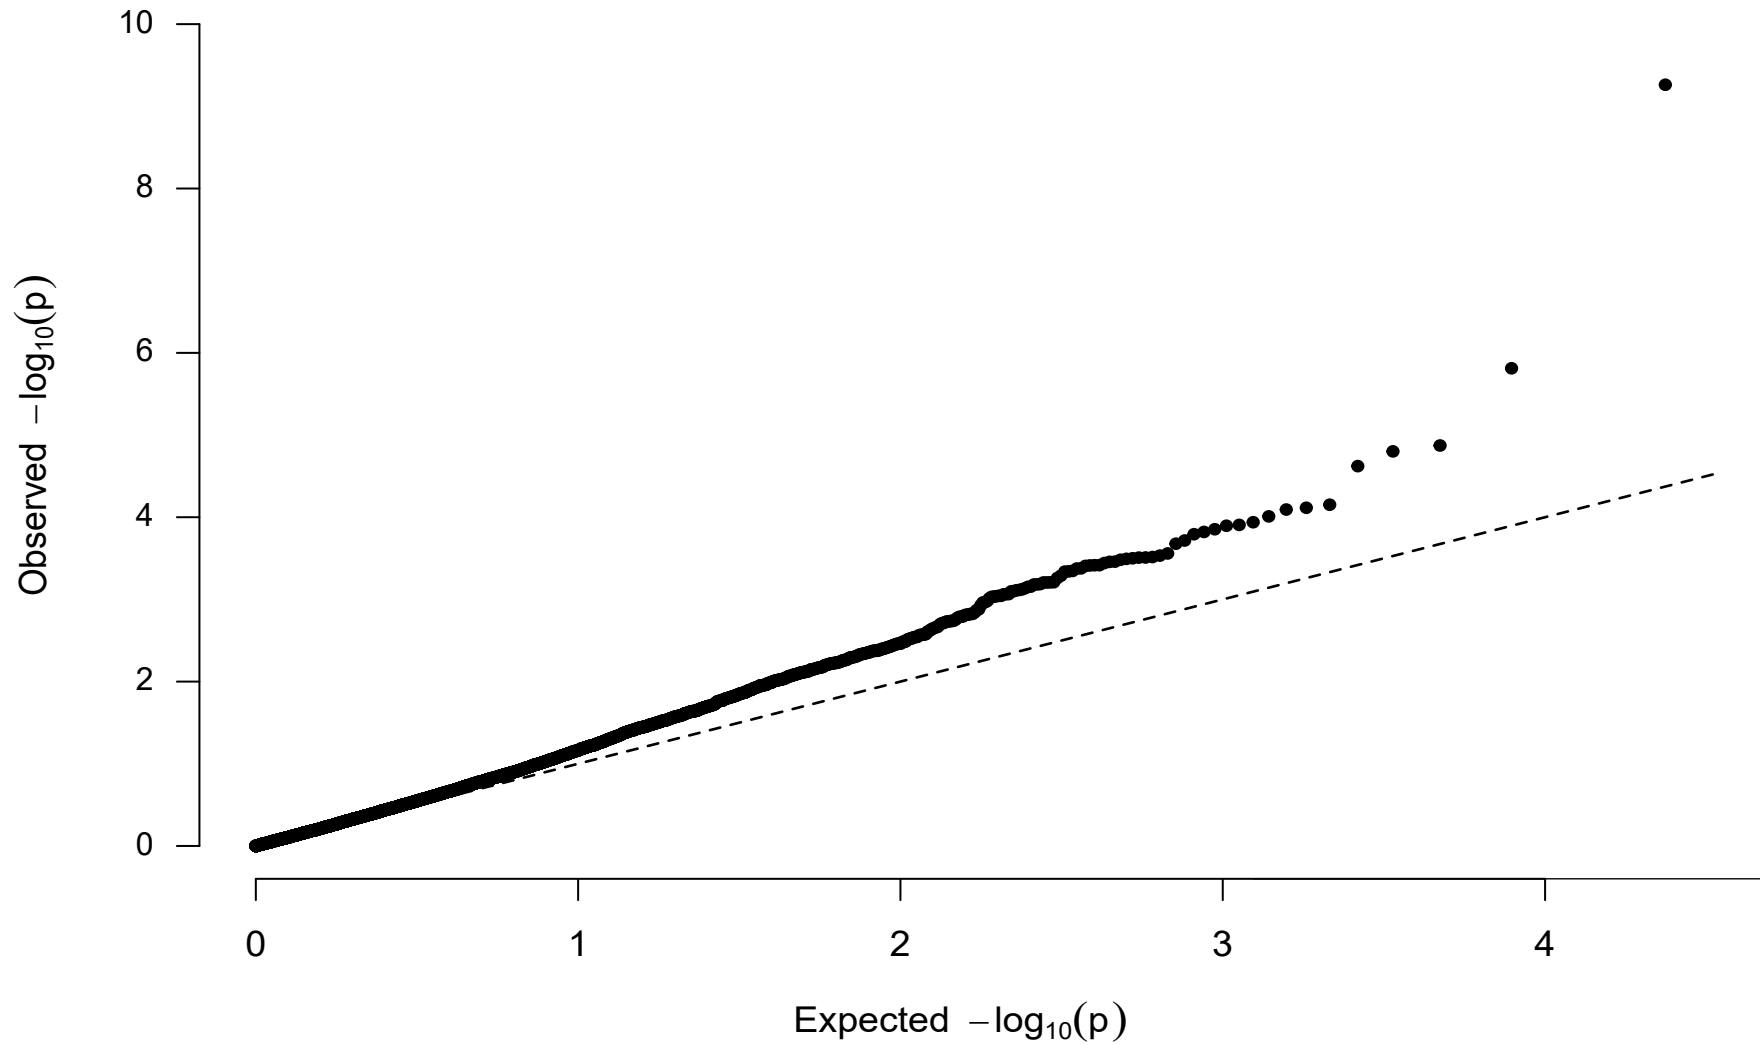

Supplement: Supplementary_Figure_1.pdf [file Supplementary_Figure_1.pdf]
